1 **CropSurveyor: a scalable open-source experiment management**  
2 **system for distributed plant phenotyping and IoT-based crop**  
3 **management**

4  
5 **Authors**

6 Daniel Reynolds<sup>1,\*</sup>, Daniel.Reynolds@earlham.ac.uk, orcid: 0000-0001-5846-0016

7 Joshua Ball<sup>1</sup>, Joshua.Ball@earlham.ac.uk, orcid: 0000-0003-4840-3768

8 Alan Bauer<sup>1</sup>, Alan.Bauer@earlham.ac.uk, orcid: 0000-0002-7443-1511

9 Simon Griffiths<sup>2</sup>, Simon.Griffiths@jic.ac.uk, orcid: 0000-0003-2435-7963

10 Ji Zhou<sup>1,3,4,\*</sup>, Ji.Zhou@earlham.ac.uk, Ji.Zhou@njau.edu.cn, orcid: 0000-0002-5752-5524

11

12 <sup>1</sup>Earlham Institute, Norwich Research Park, Norwich, NR4 7UZ, UK

13 <sup>2</sup>John Innes Centre, Norwich Research Park, Norwich, NR4 7UH, UK

14 <sup>3</sup>Plant Phenomics Research Center, Nanjing Agricultural University, Nanjing, 210095, China

15 <sup>4</sup>University of East Anglia, Norwich Research Park, Norwich, NR4 7TJ, UK

16

17 **Corresponding authors**

18 Daniel.Reynolds@earlham.ac.uk; Ji.Zhou@earlham.ac.uk and Ji.Zhou@njau.edu.cn

19

20 **Abstract**

21 **Background:** High-quality plant phenotyping and climate data lay the foundation of phenotypic  
22 analysis as well as genotype-by-environment interactions, which is important biological evidence not  
23 only to understand the dynamics between crop performance, genotypes, and environmental factors,  
24 but also for agronomists and farmers to monitor crops in fluctuating agricultural conditions. With the  
25 rise of Internet of Things technologies in recent years, many IoT-based remote sensing devices have

26 been applied to phenotyping and crop monitoring that generate big plant-environment datasets every  
27 day; however, it is still technically challenging to calibrate, annotate, and aggregate big data  
28 effectively, especially when they were generated in multiple locations, and often at different scales.

29 **Findings:** CropSurveyor is a PHP and SQL based server platform, which provides automated data  
30 collation, storage, device and experiment management through IoT-based sensors and distributed  
31 plant phenotyping workstations. It provides a two-component solution for monitoring biological  
32 experiments and networked devices, with interfaces specifically designed for distributed IoT devices  
33 and centralised data servers. Data transfer is performed automatically through an HTTP accessible  
34 RESTful API installed on both device-side and server-side of the CropSurveyor system, which  
35 synchronise daily representative crop growth images for quick and visual-based crop assessment, as  
36 well as detailed microclimate readings for GxE studies. CropSurveyor also supports the comparison  
37 of historical and ongoing crop performance whilst different experiments are being conducted.

38 **Conclusions:** As an open-source experiment and data management system, CropSurveyor can be used  
39 to maintain and collate important crop performance and microclimate datasets captured by IoT  
40 sensors and distributed phenotyping installations. It provides near real-time environmental and crop  
41 growth monitoring in addition to historical and current data comparison through a single cloud-ready  
42 server system. Accessible both locally in the field through smart devices and remotely in an office  
43 using a PC, CropSurveyor has been used in wheat field experiments for prebreeding since 2016 and  
44 has the potential to enable scalable crop management and IoT-style agricultural practices in the near  
45 future.

46

#### 47 **Keywords**

48 IoT in agriculture, distributed phenotyping, remote sensing, plant phenomics, experiment management

## 49 **Background**

50 Automated phenotyping technology has the potential to enable continuous and precise measurement  
51 of phenotypes that are key to today's crop research [1,2]. Quantitative phenotypic traits collected  
52 through crop development are not only important evidence for biologists to understand the dynamics  
53 between crop performance, genotypes, and environmental factors (e.g. genotype-by-environment  
54 interactions, GxE), but critical for agronomists and farmers to monitor crops in fluctuating agricultural  
55 conditions [3–5]. High quality phenotyping and climate datasets lay the foundation for meaningful  
56 phenotypic analysis, which is likely to produce an accurate delineation of the genotype-to-phenotype  
57 pathway for assessing yield potential and environmental adaptation [6,7]. Presently, although many  
58 automated phenotyping platforms are capable of accumulating big plant-environment data [8], it is  
59 still technically challenging to collect, calibrate, annotate, and aggregate the data effectively, for  
60 biological experiments carried out in multiple locations, and often at different scales [9,10].

61 With the rise of Internet of Things (IoT) technologies and their applications in plant phenotyping  
62 [11], a number of commercial data management solutions have been developed on the base of  
63 customised hardware and proprietary software. For example, the Field Scanalyzer system (LemnaTec)  
64 employs a simple HTTP server with an SQLite database to facilitate crop monitoring and deep field  
65 phenotyping using LemnaControl and LemnaBase software [12]; Integrated Analysis Platform  
66 (LemnaTec) [13] provides an automated pipeline to combine raw image collection and metadata  
67 association for indoor phenotyping; the FieldScan system (Phenospex) [14] uses infield WiFi network  
68 to connect PlantEye™ 3D laser scanners, climate sensors, and a gantry system with a PostgreSQL  
69 database to realise the scanner-to-plant phenotyping; and, PlantScreen™ system (Photon Systems  
70 Instruments, PSI) manages fluorescence images and trait scores through dedicated networks and  
71 databases [15]. However, all these commercial systems require ongoing licensing maintenance and  
72 additional costs for developing new functions. It is therefore challenging for a broader plant research  
73 community to adopt and extend them easily in order to meet the growing needs of today's crop  
74 research [10].

75 Recently, some research-based systems have also been introduced to the scientific community. For  
76 example, PhotosynQ software manages data collection and storage through a handheld device called  
77 MultispeQ [16]. It uses Bluetooth to retrieve leaf surface images, environmental and geolocational  
78 data collected by MultispeQ and stores them in a mobile phone or a laptop. The system requires  
79 manual interference for data synchronisation and centralised analysis via onsite workstations or cloud-  
80 based servers. Hence, it is tailored for small-scale and qualitative phenotyping tasks. BreedVision is  
81 another system that gathers data through a network-based HTTP server [17]. Mounting multiple  
82 sensors on a tractor, BreedVision is used to carry out field phenotyping for wheat breeding. Sensors  
83 communicate to a SQL database running in an embedded system. However, this platform is designed  
84 for bespoke hardware and does not provide an open application programming interface (API),  
85 indicating that it is incompatible with external hardware and software. Solely for collecting climate  
86 datasets, the PANGEA architecture [18] was successfully established to network large numbers of  
87 connections (e.g. wireless sensor networks, WSN) for agricultural practises [19]. This system has  
88 been used to integrate large-scale WSN installations through open and distributed smart device  
89 interfaces. However, it cannot handle image-based datasets and thus limits its applications in  
90 phenomics driven crop research. Lately, a comprehensive and open-source Phenotyping Hybrid  
91 Information System (PHIS) has been developed by INRA [20]. PHIS system aims to provide a  
92 platform to enable data tracing and reanalysis of phenomic data collected on thousands of plants,  
93 sensors and events. It can identify and retrieve objects, traits and relations via ontologies and  
94 semantics. Because the PHIS system needs to incorporate many external phenotyping and modelling  
95 systems, it is heavyweight and mainly focuses on post-experimental data integration and analysis.

96 The above industrial and academic efforts identify the need to develop a scalable and openly  
97 available data management system. It needs to handle different types of datasets acquired in  
98 automated plant phenotyping experiments. To integrate data transfer, calibration, annotation and  
99 aggregation effectively, such a system should be flexible for changeable experimental designs and  
100 expandable with third-party hardware and external software. More importantly, the system needs to

101 enable users to closely monitor experiments conducted in different locations whilst the experiments  
102 are being conducted.

103 With these design requirements in mind, we developed CropSurveyor, an IoT-based data  
104 management system that is easy to use and flexible to deploy in diverse experimental scenarios.  
105 CropSurveyor is a scalable and open-source software system, which provides diverse interfacing  
106 options for the community to adopt and extend. We followed a distributed IoT systems design during  
107 the development, so that experimental, phenotypic, and environmental data collected from infield and  
108 indoor experiments could be integrated efficiently. The system provides a unified web interface for  
109 users to oversee data collection, calibration and storage on a regular basis. Through our three-year  
110 wheat prebreeding experiments (2016-2018) [21], a powerful visualisation component and a flexible  
111 data/experiment management solution has been established. Equipped with CropSurveyor, users can  
112 now closely monitor different experiments, ongoing and historic, running in different locations.  
113 Furthermore, the modulated software architecture has made it possible to change scale and  
114 performance for new experimental needs. To our knowledge, the research-based CropSurveyor  
115 system has the potential to significantly contribute towards dynamic data collection and experimental  
116 management, for both plant phenotyping and crop GxE studies.

117

## 118 **Findings**

119 IoT is a fast-growing field. IoT-based sensors are generating terabytes of data for crop research and  
120 agriculture services everyday [22]. Because the existing data management solutions heavily rely on  
121 bespoke data collection approaches, they cannot be easily adopted and extended. Also, most of the  
122 solutions require the construction of a centralised management system, which would not resolve the  
123 problem of scalability and accessibility, because the distributed nature of IoT technologies and the  
124 centralised data administration infrastructure are likely to confound each other. Instead, we developed  
125 a two-component solution. The first part of this is a device-side system that is lightweight and capable  
126 of interacting directly with distributed IoT devices, ensuring onboard data standardisation and data  
127 collection. The second component is a server-side system that collates and stores image- and sensor-

128 based datasets, with SQL as the back-end. This server-side system is comprehensive and responsible  
129 for visualising dynamic crop-environment data collected during experiments. Combining both parts,  
130 the open-source CropSurveyor system is capable of bringing scalability and flexibility to users.

131

### 132 *The systems design*

133 The two-component systems design of CropSurveyor is shown in [Fig. 1](#). We used a Python-based web  
134 framework, Flask [23,24], as the base for the device-side services. The main reason for this choice is  
135 that Python, a high-level programming language widely used by the scientific community, can interact  
136 with many single-board computers (e.g. a *Raspberry Pi* computer) commonly embedded in distributed  
137 IoT sensors and/or phenotyping devices. This framework administers onboard data storage and  
138 establishes a lightweight server for web-based interactions ([Fig. 1A](#)). As Flask is hardware  
139 independent, the approach can be applied to any hardware that supports Python. Additional services  
140 such as Linux *crontab* scheduling system, dynamic host configuration protocol (DHCP, used for  
141 establishing self-operating WiFi network), and virtual network computing (VNC) services can be  
142 easily added or removed to maintain the simplicity of the device-side system.

143 Powered by PHP5+ [25] and MySQL [26], the device-side system can facilitate real-time  
144 interactions between smart devices (e.g. smartphones and tablets) and IoT devices. The graphic user  
145 interface (GUI) was developed using PHP and JavaScript, which can be opened in a web browser  
146 such as Chrome and Firefox on any smart device. A PHP-based RESTful API [27] was adopted to  
147 regulate hourly client-server communications. A lightweight SQL server, MariaDB [28], was used for  
148 collecting and storing different formats of datasets, including images, climate sensors, and  
149 experimental settings. The device-side system can also be used to initiate a live video streaming for  
150 users to deploy infield or indoor phenotyping devices ([Supplementary Fig. 1](#)), so that an experiment  
151 can be initiated or terminated via a smartphone or a tablet. Also, the GUI allows users to enter  
152 metadata including trials, experiments (e.g. genotypes, treatments and biological replicates), and brief  
153 description, while phenotyping devices are being installed. The distributed IoT-based design has  
154 massively improved the mobility and flexibility for conducting phenotyping tasks.

155 The server-side system bridges the connection between data aggregation and cloud-based  
156 interfacing (Fig. 1B). This approach facilitates biological datasets acquired at different locations to be  
157 synchronised with a centralised server for detailed traits analyses and decision making in crop  
158 management. PHP5+ was used to develop the system that supports Apache and an SQL server such as  
159 MySQL [26]. The server-side system initiates regular updates of the status of each distributed IoT  
160 device with information such as online or offline status of the device, operational mode,  
161 representative daily images, micro-climate readings, and the usage of computing resources (i.e. CPU  
162 and memory). Since 2017, the two-component CropSurveyor system has been successfully applied to  
163 monitor indoor wheat speed breeding [29] and infield wheat prebreeding simultaneously  
164 (Supplementary Fig. 2).

165

#### 166 *An MVC architecture*

167 Whilst CropSurveyor is designed to allow users with no technical background to use, the installation  
168 of the system still requires an IT technician to complete (see Additional File 1). To install the system,  
169 a functioning PHP and SQL server is required. Also, as it runs on a network-enabled web server, a  
170 network infrastructure is required to properly function CropSurveyor (Fig. 2). However, due to the  
171 rural location of many crop research experiments, it is often expensive and unfeasible to install wired  
172 or wireless networks in some experimental sites. Hence, our solution is to establish an ad-hoc and  
173 self-managed network through USB WiFi dongles mounted on IoT devices, e.g. a distributed  
174 CropQuant phenotyping workstation [21], so CropSurveyor can transfer data between distributed IoT  
175 devices and a central server. The self-managed network can be either a Star or a Mesh network  
176 topology, enabling peer-to-peer HTTP accessing points to network IoT devices for data calibration  
177 and synchronisation in the field (Fig. 2A), or to establish a direct link between a smart device and a  
178 phenotyping workstation (Fig. 2B). After correlating and collecting all data from the device side, the  
179 system will then transfer the data to the server-side powered by a central server, where users could  
180 oversee different experiments at near real-time (Fig. 2C).

181 When implementing the CropSurveyor system, we followed Model-view-controller (MVC)  
182 software architecture, dividing the system into three interconnected parts to separate internal  
183 information flows based on how they are presented to the user [30]. Using the MVC pattern to  
184 interface different parts of the CropSurveyor system, not only source code of both device-side and  
185 server-side systems can be reused, we could also enable modulated parallel software development,  
186 while biological experiments were still ongoing (Fig. 2D).

187 To enable data standardisation and integration, a RESTful API was implemented that accepts  
188 image- and sensor-based datasets and IoT device status updates in JSON format. All interactions  
189 between devices and the server are authenticated using a pre-shared key pair to ensure that datasets  
190 collected are from a trusted source. The RESTful design strategy ensures that all data requested for  
191 transaction is contained within a single request, allowing devices to compile all information into one  
192 JSON object and then transmit through an HTTP POST request. The *Model* implementation allows us  
193 to determine dynamic data structure, as well as how to manage logic and rules of the CropSurveyor  
194 system. The entity–relationship model (ER diagram) used for establishing the database including  
195 entity types and specifies relationships between the entity types can be seen in [Supplementary Fig. 3](#).

196 Based on PHP server (Apache tested) and SQL server (MySQL and MariaDB tested), the *Controller*  
197 component responds to user input and internal interactions on the data model. The controller receives  
198 image, sensor and system status as the input data flows, validates them, and then passes them to the  
199 model component, first on distributed device-side server and then transmitted to a globally accessible  
200 server-side server, which mirrors the input data. Internet connections are required, if the input datasets  
201 need to be transferred from a field experiment site to onsite servers. The form of data transmission can  
202 be either wired ethernet or Wi-Fi network. The Controller administers data collation between device-  
203 side and server-side by mimicking the device API call to the higher-level server API, at the time of  
204 device request is programmed.

205 The *View* component presents the data model and user interactions in two formats. First, through an  
206 active HTTP connection and D3.js graphing engine [30], users can access distributed IoT devices via  
207 web browsers (Chrome and Firefox tested) installed on any smart device, in the field or in



208 greenhouses. The device-side CropSurveyor provides a tailored GUI interface, within which users can  
209 deploy (see [Additional File 1](#)), monitor, assess and download captured data on demand. Second, the  
210 device-side system synchronises with the server at regular intervals, based on which CropSurveyor  
211 provides a more comprehensive GUI to present both experimental and technical status of ongoing  
212 experiments. The device-side system is designed to be distributed. So, if a given IoT device cannot  
213 make a direct internet connection for any reasons, the device-side system will enable local data  
214 storage as a server node. After the networking is re-established, the system can then forward collected  
215 data automatically (the onboard USB memory stick normally can store 30 days' image and sensor  
216 data).

217

### 218 *Experiment and data management*

219 Monitoring dynamic plant phenotypes such as height, growth rate, growth stages, and associated  
220 climate conditions in biological experiments can be a laborious and time-consuming task. It is even  
221 more challenging if we need to calibrate and verify datasets collected via devices deployed in  
222 different sites. In particular, low-quality and missing data often leads to analysis errors and unusable  
223 results, normally identified after the completion of a given experiment [31]. Hence, the server-side  
224 CropSurveyor system was designed to oversee ongoing experiments based on representative daily  
225 images, hourly sensor data collected from each phenotyping device, as well as experimental settings  
226 such as genotype, treatment, drilling date, plot position and biological replicate.

227 The interfaces of experiment and data management are presented in [Fig. 3](#), which integrate  
228 experiment location, plot map, and crop/experiment/device information to enable quick cross-  
229 referencing and facilitate management decisions during the experiment. As shown in [Fig. 3A](#), for a  
230 given experiment, the grid view of the server-side system provides a set of device nodes showing  
231 GPS-tagged project geolocation, identifiers of installed phenotyping devices, representative daily  
232 images of monitored plots, and colour coded status indicator displaying the operation mode of each  
233 device. CropSurveyor reads the device-side server's GPS coordinates and presents the geolocation in  
234 an embedded Google Map for users to locate the experiment. In addition to the GPS location of the

235 experiment, an embedded plot map is also provided demonstrating individual device position in the  
236 field or in greenhouses together with colour coded status markers on the relevant plots to quickly  
237 indicate whether extra attention is needed (e.g. green for operating, amber for idle, and red for device  
238 termination or operational error). These markers in the plot map can be clicked, which will bring the  
239 user to the detailed view of individual device (Fig. 4). Each phenotyping device uploads a daily  
240 representative image of the monitored plant or plot. The resolution of the image is 640x480 pixels,  
241 downsized from 2592x1944 pixels to enable constant data transmission for large-scale device-server  
242 data synchronisation. The image is automatically selected based on file size, intensity, and image  
243 clarity. The grid view of these representative image is used as a snapshot of the experiment, so that  
244 users can quickly assess plant growth and performance of each genotype without regularly walking in  
245 the field during the growing season.

246 The list view provides a table of status that incorporates crop information with experiment and  
247 device details (Fig. 3B). This view is mainly used for project maintenance proposes, which contains  
248 three sections. First, similar to the grid view, crop information identifier lists phenotyping devices  
249 installed in the experiment. Second, experiment information includes a coloured status indicator to  
250 display the operational mode of a given device, the experiment duration of a given device, and the  
251 latest timestamp of data synchronisation. Device uptime (i.e. experiment duration) is computed using  
252 the device's internal clock (the Linux `uptime` command) and the time when the latest image is  
253 captured. Third, device information shows: (1) each device's onboard storage, using filled bars to  
254 indicate the percentage of space left in gigabytes (GB) based on regular 30-minute updates; (2)  
255 buttons to download image- ("Crop Growth Image Series", in monthly Zip archives) and sensor-based  
256 ("Download Sensor Data", in a CSV file) datasets collated during the experiment from the SQL  
257 database; and (3) device interaction buttons, providing direct device control and configuration via  
258 Secure Shell (SSH) or VNC.

259

## 260 *Continuous microclimate visualisation*

261 Microclimate is an important evidence for crop scientist to monitor radiation/ambient/soil variation in  
262 different locations over the whole experiment site, which closely connects with the performance at  
263 both plant and plot levels [32]. To facilitate the monitoring of microclimate during the experiment, a  
264 comprehensive visualisation function has been developed (Fig. 4). By accessing an individual  
265 device's detail page, collected environmental factors can be viewed as individual line charts along  
266 with the device information. IoT-based climate sensor readings are logged with the central server and  
267 then indexed by device and location, allowing near real-time microclimate readings (30-minute  
268 updates) of monitored regions. The visualisation is done in the web browser using the D3 JavaScript  
269 library. In our case, we can soundly retrieve readings such as device temperature (to assess device  
270 performance), ambient relative humidity, ambient temperature (Fig. 4A), light levels (based on light  
271 intensity), soil temperature and moisture (Fig. 4B). The microclimate datasets acquired from multiple  
272 locations across the field can also be used for data calibration to generate a normalised and highly  
273 reliable environmental reading of the experimental site.

274

## 275 *Applications in wheat field experiments*

276 A key element of modern agriculture is to closely monitor dynamic crop performance and agricultural  
277 conditions to predict and plan crop production [33]. Plant breeding and GxE studies also rely on high-  
278 quality and high-frequency crop-environment data to produce accurate growth models for yield and  
279 quality prediction [34,35]. Following this approach, CropSurveyor provides users with quick access to  
280 all environmental factors recorded by each distributed phenotyping device during the growing season.  
281 Together with the position of a given device, seasonal microclimate datasets can form a dynamic  
282 growth condition map showing environmental conditions and variance in a given field (Fig. 5).

283 In a 253-day field experiment of 32 wheat genotypes within the single genetic background of  
284 Paragon (a UK spring wheat variety) accomplished in 2017, we have installed 16 CropQuant field  
285 phenotyping workstations to monitor six-metre wheat plots to collect continuous crop growth image  
286 series as well as associated microclimate conditions such as ambient temperature, relative humidity,

287 light levels, soil temperature and soil humidity. When the environmental data was being collated, a  
288 field map of dynamic microclimate conditions at key growth stages (i.e. from early booting to early  
289 grain filling, 56 days) was gradually produced, showing the increase in ambient temperature (Fig.  
290 5A), the variation of ambient moisture levels (Fig. 5B), and the steady increase of soil temperature  
291 (Fig. 5C), during the 56-day period. To simplify the presentation, the microclimate heatmap was  
292 presented with data at 14-day intervals, where wheat plots installed with IoT sensors were outlined  
293 with red colour and plots without sensors were outlined with green colour, where climate data was  
294 produced through data interpolation methods based on adjacent readings (Fig. 5). The period of the  
295 interval can be flexibly changed, and the microclimate readings are retrievable as soon as data  
296 synchronisation is finished (see Supplementary Fig.4 for daily data presentation). Furthermore, the  
297 climate datasets can be used for cross-validating the soundness of infield IoT sensors, for example,  
298 whether soil temperature correlates with ambient temperature (Supplementary Fig. 4A); and why  
299 readings from distributed low-cost sensors could provide more representative information of the field  
300 in comparison with an expensive central weather station in the field (Supplementary Fig. 4B).

301 Utilising this approach, dynamic environmental conditions throughout a field can be recorded with  
302 very low-cost climate sensors, which can then be scaled up through interpolation methods to cover  
303 regions without sensors. Through wheat field experiments between 2016 and 2018 at Norwich  
304 Research Park, we believe that distributed IoT sensors together with the CropSurveyor system are  
305 capable of providing invaluable crop monitoring and management data in near real-time.

306

### 307 *Comparison between multi-year experiments*

308 CropSurveyor not only provides tools for monitoring ongoing infield and indoor experiments, but also  
309 supplies toolkits to reference and download historical datasets. An important function in crop research  
310 is the ability to compare collected results with past experiments. To this end CropSurveyor stores all  
311 image and sensor data and manages these historical datasets with easy reference and access (Fig. 6).  
312 Historical datasets can be retrieved through the frontpage similar to ongoing experiments (multiple  
313 projects can be administered by CropSurveyor simultaneously). After opening a completed project,

314 users can display the GPS-tagged geolocation of the project and devices used in the project together  
315 with project references (Fig. 6A). By clicking a specific plot within the experimental field,  
316 CropSurveyor can directly reference environmental and image datasets in the plot, a view with device  
317 name, date of last capture and last image taken by the IoT device (Fig. 6B). If users want to revisit  
318 previous datasets in the project, they can download both sensor data packages and/or growth image  
319 series in monthly archives by clicking the archive links (Fig. 6C). This design enables a unified  
320 platform to facilitate both ongoing and historical data management to assist in-experiment and post-  
321 experiment data analysis.

322

### 323 **Discussion and outlook**

324 The continuing challenge of global food security caused by fluctuating environments and a narrower  
325 range of genetic variation of modern crops requires innovative thoughts and technologies to improve  
326 crop productivity and sustainability [2,36,37]. As European infrastructures for sustainable agriculture  
327 (e.g. EMPHASIS and AnaEE) have identified, openly shareable solutions built on widely accessible  
328 digital infrastructures are likely to provide an effective solution to address the challenge by integrating  
329 novel scientific concepts, sensors and models [38,39]. The IoT-based CropSurveyor system presented  
330 here is scalable and open-source, providing the scientific community various interfacing options to  
331 adopt and extend. The openly available platform integrates the archiving and collation of high-  
332 frequency environmental data and crop images automatically, which can be used for both phenotypic  
333 analyses as well as agricultural decision making. By associating environmental conditions directly  
334 with crop growth data, we trust that the system is capable of forming a sound base for reliable GxE  
335 studies. More importantly, CropSurveyor provides geolocation and remote sensor readings of current  
336 and historical experiments, a comprehensive solution to enable multi-site and multi-year cross-  
337 referencing of traits analyses as well as crop performance monitoring.

338 Because CropSurveyor facilitates the real-time distributed access of microclimate conditions and  
339 crop imagery (through live video streaming) on-demand in the field or in greenhouses, either through  
340 a smart device or an office PC, users can make a quick decision of crop performance, growth stages,

341 and plot conditions of any monitored locations in a given experiment, field, or site. More importantly,  
342 automatic data transmission allows a centralised data and experiment management, which means that  
343 the system can be scaled up to the national scale if a broader IoT in agriculture infrastructure is in  
344 place. As collected data is annotated and pre-selected on distributed phenotyping or IoT-based  
345 devices, only standardised crop-environment datasets are collected from different experiments to  
346 support detailed analysis and meaningful cross-referencing. Furthermore, openly sharing results from  
347 different sites and different experiments will enable crop researchers, breeders, and farmers to gain  
348 great benefits, for example, predicting and prewarning disease spread at the national scale so that  
349 early adoption of preventative measures can be arranged.

350 Presently, many governments are shifting their focuses towards innovative technologies to  
351 modernise crop and agricultural research. The UK Government, for example, has invested heavily in  
352 IoT-based technologies to address challenges on yield production, food traceability, environmental  
353 challenges, incompatibility, and lack of infrastructure [40]. We believe that CropSurveyor can also  
354 address some of the current challenges directly. For example, by logging historical data and  
355 annotating crop growth and environmental effects within monitored fields can increase crop  
356 traceability. To reduce the overall use of agrochemicals as part of a precision farming strategy  
357 [41,42], CropSurveyor can be used to identify the appropriate timing and areas for chemical  
358 application together with infield imaging and ambient sensors. Water is in limited supply for large  
359 regions of the globe and the reduction of unnecessary irrigation would be of large benefit to the cost-  
360 effectiveness of agriculture [43,44]. As discussed previously, CropSurveyor is built in with near real-  
361 time environment monitoring mechanisms including soil temperature, soil moisture levels, and  
362 ambient humidity. Hence, it provides information crucial to make decisions and targeting irrigation in  
363 timing and location. Additionally, by linking extra climate sensors with IoT devices, further  
364 environmental readings can be extended in CropSurveyor for growing agricultural needs.

365 Besides the near real-time environmental and crop growth monitoring, historic and current datasets  
366 collated in a central system can also deliver predictive powers. An example of potentially predictable  
367 situations is the “Smith Period” for predicting Late Blight in potato crops [45]. Late Blight is shown

368 to be more likely to occur during a “Smith Period”, which is defined by a period of two or more days  
369 with a minimum temperature of 10°C and a humidity of 90%, or above for at least 11 hours in each  
370 day. Having direct access to dynamic sensor readings on the CropSurveyor can allow the monitoring  
371 of specific environmental patterns much easier and thus establish an important tool to inform farmers  
372 and growers to apply fungicides and chemical treatments to the appropriate areas. Based on this  
373 potential development, CropSurveyor is potentially able to serve sustainable agriculture and  
374 environmentally friendliness of food production under today’s changeable climates.

375

### 376 *Future Development*

377 To establish a data and experiment management system that is scalable and usable on regional,  
378 national or even global crop research and agricultural practices, we believe that CropSurveyor in  
379 connection with distributed IoT sensors can meet the future demand of usability and scalability, with  
380 some further development. One area of expansion is in scalability. The system is currently tested on  
381 local server with a direct network connection to at least one of the distributed nodes. To allow the  
382 expansion at a larger, national, or even global scale, the reliance on maintained servers would be less  
383 effective than a true cloud enabled service. Hence, by moving the CropSurveyor system to a globally  
384 accessible cloud server with cloud enabled distributed storage is a feasible approach, as the  
385 requirements for institutions and agricultural practitioners to maintain servers and storage are  
386 removed. Given the lack of network infrastructure in rural areas in many countries, the addition of 3G  
387 or 4G mobile data networks to key distributed nodes in the field can improve the infield network,  
388 upon which the data communication of a large number of Agri-Tech devices can be relied.

389 Another prohibitive factor in IoT in agriculture is the quantity and costs of IoT devices required to  
390 cover an entire field. Based on our three-year field experiments, we believe that installing sensors and  
391 phenotyping workstations to cover every area in the field is unnecessary. [Fig. 5](#) shows that the data  
392 interpolation approach we have applied to generate microclimate readings between randomly  
393 positioned stations to model the effect of environmental variation in the whole experimental field.

394 This approach of subsampling produced high-quality environmental readings, which we believe could  
395 be key to the effective and feasible use of IoT in agricultural. Additionally, with the development of  
396 national IoT infrastructure, the similar subsampling idea can be expanded to a larger and multi-site  
397 level, which can then truly help inform decision in crop research and agricultural practices at the  
398 national level, across a country's arable land.

399

#### 400 **Availability and requirements**

401 Project name: CropSurveyor for wheat prebreeding in Designing Future Wheat

402 Project home page: <https://github.com/Crop-Phenomics-Group/cropsurveyor/releases>

403 Operating system(s): Platform independent

404 Programming language: Python, PHP, JavaScript, SQL

405 Requirements: Apache (or other PHP5+) server, MySQL (or other SQL) server, a recent version of  
406 Chrome, Firefox, or Safari

407 License: BSD-3-Clause available at: <https://opensource.org/licenses/BSD-3-Clause>

408

#### 409 **Availability of supporting data**

410 The datasets supporting the results presented here is available at [https://github.com/Crop-Phenomics-](https://github.com/Crop-Phenomics-Group/cropsurveyor/releases)  
411 [Group/cropsurveyor/releases](https://github.com/Crop-Phenomics-Group/cropsurveyor/releases). Snapshots of the code and other supporting data are also openly  
412 available in the GitHub repository.

413

#### 414 **Additional files**

415 Additional File 1.docx

416 MS Word Document (.docx)



417 CropSurveyor Installation Instructions and Interface Details

418 Additional file gives step-by-step instructions for initialising the system through an existing PHP  
419 webserver with SQL database, details of RESTful API required fields necessary for device  
420 interaction, and addition detail of distributed installation and database integration.

421

422 Additional File 2.html

423 Web Page (.html)

424 Algorithm to generate plotted figures

425 Additional file contains full python code to replicate plotted figures within the paper, displayed within  
426 an exported iPython notebook. All datasets shown within the plotted figures of the paper are available  
427 at the project GitHub repository.

428

## 429 **Abbreviations**

430 AnaEE: Analysis and Experimentation on Ecosystems; API: Application Programming Interface;  
431 CPU: Central Processing Unit; CSV: Comma Separated value; DHCP: Dynamic Host Configuration  
432 Protocol; ER: Entity Relationship; GB: Gigabyte; GPS: Global Positioning System; GUI: Graphical  
433 User Interface; GxE: Genotype by Environment; HTTP: Hypertext Transfer Protocol; IoT: Internet of  
434 Things; IT: Information Technology; JSON: JavaScript Object Notation; MVC: Model View  
435 Controller; PHIS: Phenotyping Hybrid Information System; PHP: PHP Hypertext Pre-processor; PSI:  
436 Photon Systems Instruments; SQL: Structured Query Language; UK: United Kingdom; USB:  
437 Universal Serial Bus; VNC: Virtual Network Computing; WSN: Wireless Sensor Network

438

## 439 **Competing interests**

440 The authors declare no competing financial interests.

441

## 442 **Funding**

443 JZ, DR and SG were partially funded by UKRI Biotechnology and Biological Sciences Research  
444 Council's (BBSRC) Designing Future Wheat Cross-institute Strategic Programme (BB/P016855/1) to  
445 Prof Graham Moore, BBS/E/J/000PR9781 to SG, and BBS/E/T/000PR9785 to JZ. DR and JB were  
446 partially by the Core Strategic Programme Grant (BB/CSP17270/1) at the Earlham Institute. DR, JB  
447 and AB were also partially supported by Bayer/BASF's G4T grant (GP125JZ1J) awarded to JZ.

448

## 449 **Author contributions**

450 JZ and DR wrote the manuscript. SG provided wheat expertise and germplasm. JZ and SG designed  
451 the experiment. DR and JZ designed the CropSurveyor system. DR developed the system. JZ, JB and  
452 AB tested and packaged the system. JZ and DR performed the data analysis. DR, JB and JZ deployed  
453 hardware and software for experiments. All authors read and approved the final manuscript.

454

## 455 **Acknowledgements**

456 The authors would like to thank all members of the Zhou laboratory at EI and Nanjing Agricultural  
457 University for fruitful discussions. We thank The NBI Partnership (NBIP) computing team's support.  
458 We also thank researchers at John Innes Centre and UEA for constructive discussions.

459

## 460 **References**

461 1. Tester M, Langridge P. Breeding Technologies to Increase Crop Production in a Changing World. *Science*  
462 (80- ) [Internet]. 2010;327:818–22. Available from:  
463 <http://www.sciencemag.org/content/327/5967/818><http://www.ncbi.nlm.nih.gov/pubmed/20150489>  
464 <http://www.sciencemag.org/content/327/5967/818.full.pdf>

465 2. Bevan MW, Uauy C, Wulff BBH, Zhou J, Krasileva K, Clark MD. Genomic innovation for crop

- 466 improvement. *Nature*. Nature Publishing Group, a division of Macmillan Publishers Limited. All Rights  
467 Reserved.; 2017;543:346–54.
- 468 3. Ribaut J-M, de Vicente MC, Delannay X. Molecular breeding in developing countries: challenges and  
469 perspectives. *Curr Opin Plant Biol*. Elsevier Ltd; 2010;13:213–8.
- 470 4. Yin X, Struik PPC. Modelling the crop: from system dynamics to systems biology. *J Exp Bot*. 2010;61:2171–  
471 2183.
- 472 5. Nagano AJ, Sato Y, Mihara M, Antonio BA, Motoyama R, Itoh H, et al. Deciphering and prediction of  
473 transcriptome dynamics under fluctuating field conditions. *Cell*. Elsevier Inc.; 2012;151:1358–69.
- 474 6. Cooper M, Gho C, Leafgren R, Tang T, Messina C. Breeding drought-tolerant maize hybrids for the US corn-  
475 belt: Discovery to product. *J Exp Bot*. 2014;65:6191–4.
- 476 7. Reynolds M, Langridge P. Physiological breeding. *Curr Opin Plant Biol*. Elsevier Ltd; 2016;31:162–71.
- 477 8. Reynolds D, Baret F, Welcker C, Bostrom A, Ball J, Cellini F, et al. What is cost-efficient phenotyping?  
478 Optimizing costs for different scenarios. *Plant Sci*. 2018;In Press.
- 479 9. Fiorani F, Schurr U. Future scenarios for plant phenotyping. *Annu Rev Plant Biol*. 2013;64:267–91.
- 480 10. Tardieu F, Cabrera-Bosquet L, Pridmore T, Bennett M. Plant Phenomics, From Sensors to Knowledge. *Curr*  
481 *Biol*. 2017;27:R770–83.
- 482 11. Gubbi J, Buyya R, Marusic S, Palaniswami M. Internet of Things (IoT): A Vision, Architectural Elements,  
483 and Future Directions. *Futur Gener Comput Syst*. 2013;29:1645–60.
- 484 12. Virlet N, Sabermanesh K, Sadeghi-Tehran P, Hawkesford MJ. Field Scanalyzer: An automated robotic field  
485 phenotyping platform for detailed crop monitoring. *Funct Plant Biol*. 2017;44:143–53.
- 486 13. Klukas C, Chen D, Pape J-M. Integrated Analysis Platform: An Open-Source Information System for High-  
487 Throughput Plant Phenotyping. *Plant Physiol* [Internet]. 2014;165:506–18. Available from:  
488 <http://www.plantphysiol.org/cgi/doi/10.1104/pp.113.233932>
- 489 14. Vadez V, Kholová J, Hummel G, Zhokhavets U, Gupta SK, Hash CT. LeasyScan: A novel concept  
490 combining 3D imaging and lysimetry for high-throughput phenotyping of traits controlling plant water budget. *J*  
491 *Exp Bot*. 2015;66:5581–93.

- 492 15. Humplík JF, Lazár D, Fürst T, Husičková A, Hýbl M, Spíchal L. Automated integrative high-throughput  
493 phenotyping of plant shoots: a case study of the cold-tolerance of pea (*Pisum sativum* L.). *Plant Methods*.  
494 2015;11:1–11.
- 495 16. Kuhlert S, Austic G, Zegarac R, Osei-Bonsu I, Hoh D, Chilvers MI, et al. MultispeQ Beta: a tool for large-  
496 scale plant phenotyping connected to the open PhotosynQ network. *R Soc open Sci* [Internet]. 2016;3:160592.  
497 Available from:  
498 <http://www.ncbi.nlm.nih.gov/pubmed/27853580>  
499 [http://www.pubmedcentral.nih.gov/articlerender.fcgi?arti  
d=PMC5099005](http://www.pubmedcentral.nih.gov/articlerender.fcgi?artid=PMC5099005)
- 500 17. Busemeyer L, Mentrup D, Möller K, Wunder E, Alheit K, Hahn V, et al. Breedvision - A multi-sensor  
501 platform for non-destructive field-based phenotyping in plant breeding. *Sensors (Switzerland)*. 2013;13:2830–  
502 47.
- 503 18. Zato C, Villarrubia G, Sánchez A, Barri I, Rubión E, Fernández A, et al. PANGEA -- Platform for  
504 Automatic coNstruction of orGanizations of intElligent Agents. In: Omatu S, De Paz Santana JF, González SR,  
505 Molina JM, Bernardos AM, Rodríguez JMC, editors. *Distrib Comput Artif Intell*. Berlin, Heidelberg: Springer  
506 Berlin Heidelberg; 2012. p. 229–39.
- 507 19. Villarrubia G, De Paz JF, De La Iglesia DH, Bajo J. Combining multi-agent systems and wireless sensor  
508 networks for monitoring crop irrigation. *Sensors (Switzerland)*. 2017;17.
- 509 20. Neveu P, Tireau A, Hilgert N, Vincent N, Mineau-cesari J, Bricet N, et al. Methods Dealing with multi-  
510 source and multi-scale information in plant phenomics: the ontology-driven Phenotyping Hybrid Information  
511 System. *New Phytol*. 2018;
- 512 21. Zhou J, Reynolds D, Websdale D, Le Cornu T, Gonzalez-Navarro O, Lister C, et al. CropQuant: An  
513 automated and scalable field phenotyping platform for crop monitoring and trait measurements to facilitate  
514 breeding and digital agriculture. *bioRxiv* [Internet]. 2017;1–17. Available from:  
515 <http://www.biorxiv.org/content/early/2017/07/10/161547>
- 516 22. UK Government Office for Science. *The Internet of Things: making the most of the Second Digital  
517 Revolution*. London, UK; 2014.
- 518 23. Lewandowski CM. *Flask Web Development*. 1st ed. Eff. Br. mindfulness Interv. acute pain Exp. An Exam.  
519 *Individ. Differ*. Sebastopol: O'Reilly; 2015.

- 520 24. Ronacher A. Flask Web Development. BSD licensed; 2018.
- 521 25. PHP5 [Internet]. [cited 2018 Oct 10]. Available from: <http://php.net>
- 522 26. Oracle and its affiliates. MySQL 8.0 Reference Manual. 2018.
- 523 27. Chen X, Ji Z, Fan Y, Zhan Y. Restful API Architecture Based on Laravel Framework. J Phys Conf Ser.  
524 2017;910.
- 525 28. Lindström J, Das D, Mathiasen T, Arteaga D, Talagala N. NVM aware MariaDB database system. 2015  
526 IEEE Non-Volatile Mem Syst Appl Symp NVMSA 2015. 2015;
- 527 29. Watson A, Ghosh S, Williams MJ, Cuddy WS, Simmonds J, Rey MD, et al. Speed breeding is a powerful  
528 tool to accelerate crop research and breeding. Nat Plants [Internet]. Springer US; 2018;4:23–9. Available from:  
529 <http://dx.doi.org/10.1038/s41477-017-0083-8>
- 530 30. Krasner GE, Pope ST. A Description of the Model-View-Controller User Interface Paradigm in the  
531 Smalltalk-80 System. J object oriented Program. 1988;1:26–49.
- 532 31. Lobell DB. The use of satellite data for crop yield gap analysis. F Crop Res. Elsevier B.V.; 2013;143:56–64.
- 533 32. Jones HG. Plants and microclimate: a quantitative approach to environmental plant physiology. Third Edit.  
534 Cambridge, UK: Cambridge university press; 2013.
- 535 33. White JW, Andrade-Sanchez P, Gore M a., Bronson KF, Coffelt T a., Conley MM, et al. Field-based  
536 phenomics for plant genetics research. F Crop Res. Elsevier B.V.; 2012;133:101–12.
- 537 34. Chenu K, Cooper M, Hammer GL, Mathews KL, Dreccer MF, Chapman SCS. Environment characterization  
538 as an aid to wheat improvement: interpreting genotype-environment interactions by modelling water-deficit  
539 patterns in north-eastern Australia. J Exp Bot. 2011;62:1743– 1755.
- 540 35. King GJ. Crop epigenetics and the molecular hardware of genotype × environment interactions. Front Plant  
541 Sci. 2015;6:1–19.
- 542 36. Batchelar J, Willets D, Mauley R De, Greening J. A UK Strategy for Agricultural Technologies. 2013.
- 543 37. Karp A, Beale MH, Beaudoin F, Eastmond PJ, Neal AL, Shield IF, et al. Growing innovations for the  
544 bioeconomy. Nat Plants. 2015;1:15193.

- 545 38. Cobb JN, DeClerck G, Greenberg A, Clark R, McCouch S. Next-generation phenotyping: Requirements and  
546 strategies for enhancing our understanding of genotype-phenotype relationships and its relevance to crop  
547 improvement. *Theor Appl Genet.* 2013;126:867–87.
- 548 39. Roy J, Tardieu F, Tixier-Boichard M, Schurr U. European infrastructures for sustainable agriculture. *Nat*  
549 *Plants* [Internet]. Springer US; 2017;3:756–8. Available from: [http://www.nature.com/articles/s41477-017-](http://www.nature.com/articles/s41477-017-0027-3)  
550 0027-3
- 551 40. The Government Office for Science. The IoT: making the most of the Second Digital Revolution.  
552 *WordLink.* 2014;1–40.
- 553 41. Auernhammer H, Hermann A, Auernhammer H. Precision farming - The environmental challenge. *Comput*  
554 *Electron Agric.* 2001;30:31–43.
- 555 42. Bongiovanni R, Lowenberg-deboer J. Precision Agriculture and Sustainability. *Precis Agric.* 2004;5:359–  
556 87.
- 557 43. de Fraiture C, Wichelns D. Satisfying future water demands for agriculture. *Agric Water Manag.*  
558 2010;97:502–11.
- 559 44. Elliott J, Deryng D, Müller C, Frieler K, Konzmann M, Gerten D, et al. Constraints and potentials of future  
560 irrigation water availability on agricultural production under climate change. *Proc Natl Acad Sci.*  
561 2014;111:3239–44.
- 562 45. Taylor MC, Hardwick N V., Bradshaw NJ, Hall AM. Relative performance of five forecasting schemes for  
563 potato late blight (*Phytophthora infestans*) I. Accuracy of infection warnings and reduction of unnecessary,  
564 theoretical, fungicide applications. *Crop Prot.* 2003;22:275–83.

565

## 566 **Figures**

567

568 **Figure 1: A deployment diagram of the CropSurveyor system in biological experiments.**

569 (A) CropSurveyor facilitates users to interact with distributed infield or indoor phenotyping  
570 workstations using wired (e.g. ethernet cables) or wireless connection (e.g. smart devices' WiFi). The

571 CropSurveyor client running on distributed workstations supports remote systems interactions and  
572 onboard data management. **(B)** Users can connect, monitor and administer experiments using  
573 CropSurveyor server in real time. Through dedicated networks, the CropSurveyor back-end server  
574 collates and integrates large image- and sensor-based phenotyping datasets in an SQL database.

575

576 **Figure 2: A component diagram of the real-world deployment and application of the**  
577 **CropSurveyor system.**

578 **(A)** IoT phenotyping workstations installed at Norwich Research Park. Distributed nodes are  
579 connected by the cloud-based CropSurveyor system. **(B)** Infield phenotyping devices can be directly  
580 accessed and controlled through the local CropSurveyor client directly in the field by using a smart  
581 device. **(C)** CropSurveyor can be used remotely to manage ongoing experiments through an  
582 accessible web interface. **(D)** A detailed component diagram showing the MVC design of the  
583 CropSurveyor system and the interface between infield/indoor phenotyping workstations, local  
584 CropSurveyor server, cloud-based server and user interactions. The data input is through a RESTful  
585 API, responsible for transferring data between servers and enabling interactions through a web-based  
586 user interface.

587

588 **Figure 3: System views of CropSurveyor's user interface.**

589 **(A)** The user interface is accessible through a web browser on any computing device. The grid view  
590 of the system is designed for integrating key experimental information, showing geolocation of field  
591 experiments, experiment layout, monitored plots and genotypes, experiment duration, and  
592 representative daily images of the monitored genotypes. **(B)** The list view shows detailed statistics of  
593 all monitored crops in a given experiment, including crop information (genotypes and representative  
594 images), experimental information, and workstation information such as workstation ID, its storage,  
595 IP address, image and sensor data download, and device interaction function devices flask-based  
596 HTTP interface. This view is more useful from a system management perspective.

597

598 **Figure 4:** An individual view of a given genotype monitored by the CropSurveyor system.

599 (A) The individual view of a monitored genotype/plot accessible through the CropSurveyor user  
600 interface, detailing device and experiment information together with captured environmental sensor  
601 data. (B) Web-based graph visualisation of hourly sensor readings during a given experiment,  
602 showing ambient temperature, ambient humidity, field lighting, soil moisture, and soil temperature  
603 variation in the plot region.

604

605 **Figure 5:** The infield microclimate conditions collated by the CropSurveyor system

606 (A, B) A Heat map of ambient sensor reading of temperature and relative humidity recorded during  
607 the growing season. Each cell represents an individual plot in the 2017 field experiment. Real sensor  
608 reading outlined in red and interpolated values outlined in green. (C) A Heat map of soil-based sensor  
609 reading of soil temperature recorded during the growing season.

610

611 **Figure 6: Historical experiment data access**

612 (A) The CropSurveyor system provides access to historical experimental datasets, including the  
613 geolocation of a given project and genotypes/plots monitored in the completed project. (B) In a  
614 completed project, the last image captured in the experiment as well as historical image- and sensor  
615 datasets can be downloaded. (C) The download links for monthly image series archived in cloud.

616

617 **Supplementary Figure 1:** CropSurveyor gives access to each phenotyping device's interface  
618 allowing for device management and configuration such as live video streaming to assist in  
619 calibration and experiment setup.

620

621 **Supplementary Figure 2:** Archived data access allowing browsing and downloading of previous



622 completed trials. Accessing multiple experiments and archived historical data allows cross-  
623 referencing data and environmental conditions.

624

625 **Supplementary Figure 3:** Database Entity-Relationship diagram detailing high level entities within  
626 the CropSurveyor database and the relational links between primary, composite and foreign key  
627 fields. Diagram describes the structure of database tables; simple storage fields are not shown.

628

629 **Supplementary Figure 4:** (A) The cross-validation of two different sets of sensors, normalized soil  
630 and ambient temperature readings. (B) Different reading between distributed ambient humidity  
631 sensors (15 in the field) in comparison with a central weather station, showing different microclimate  
632 readings.

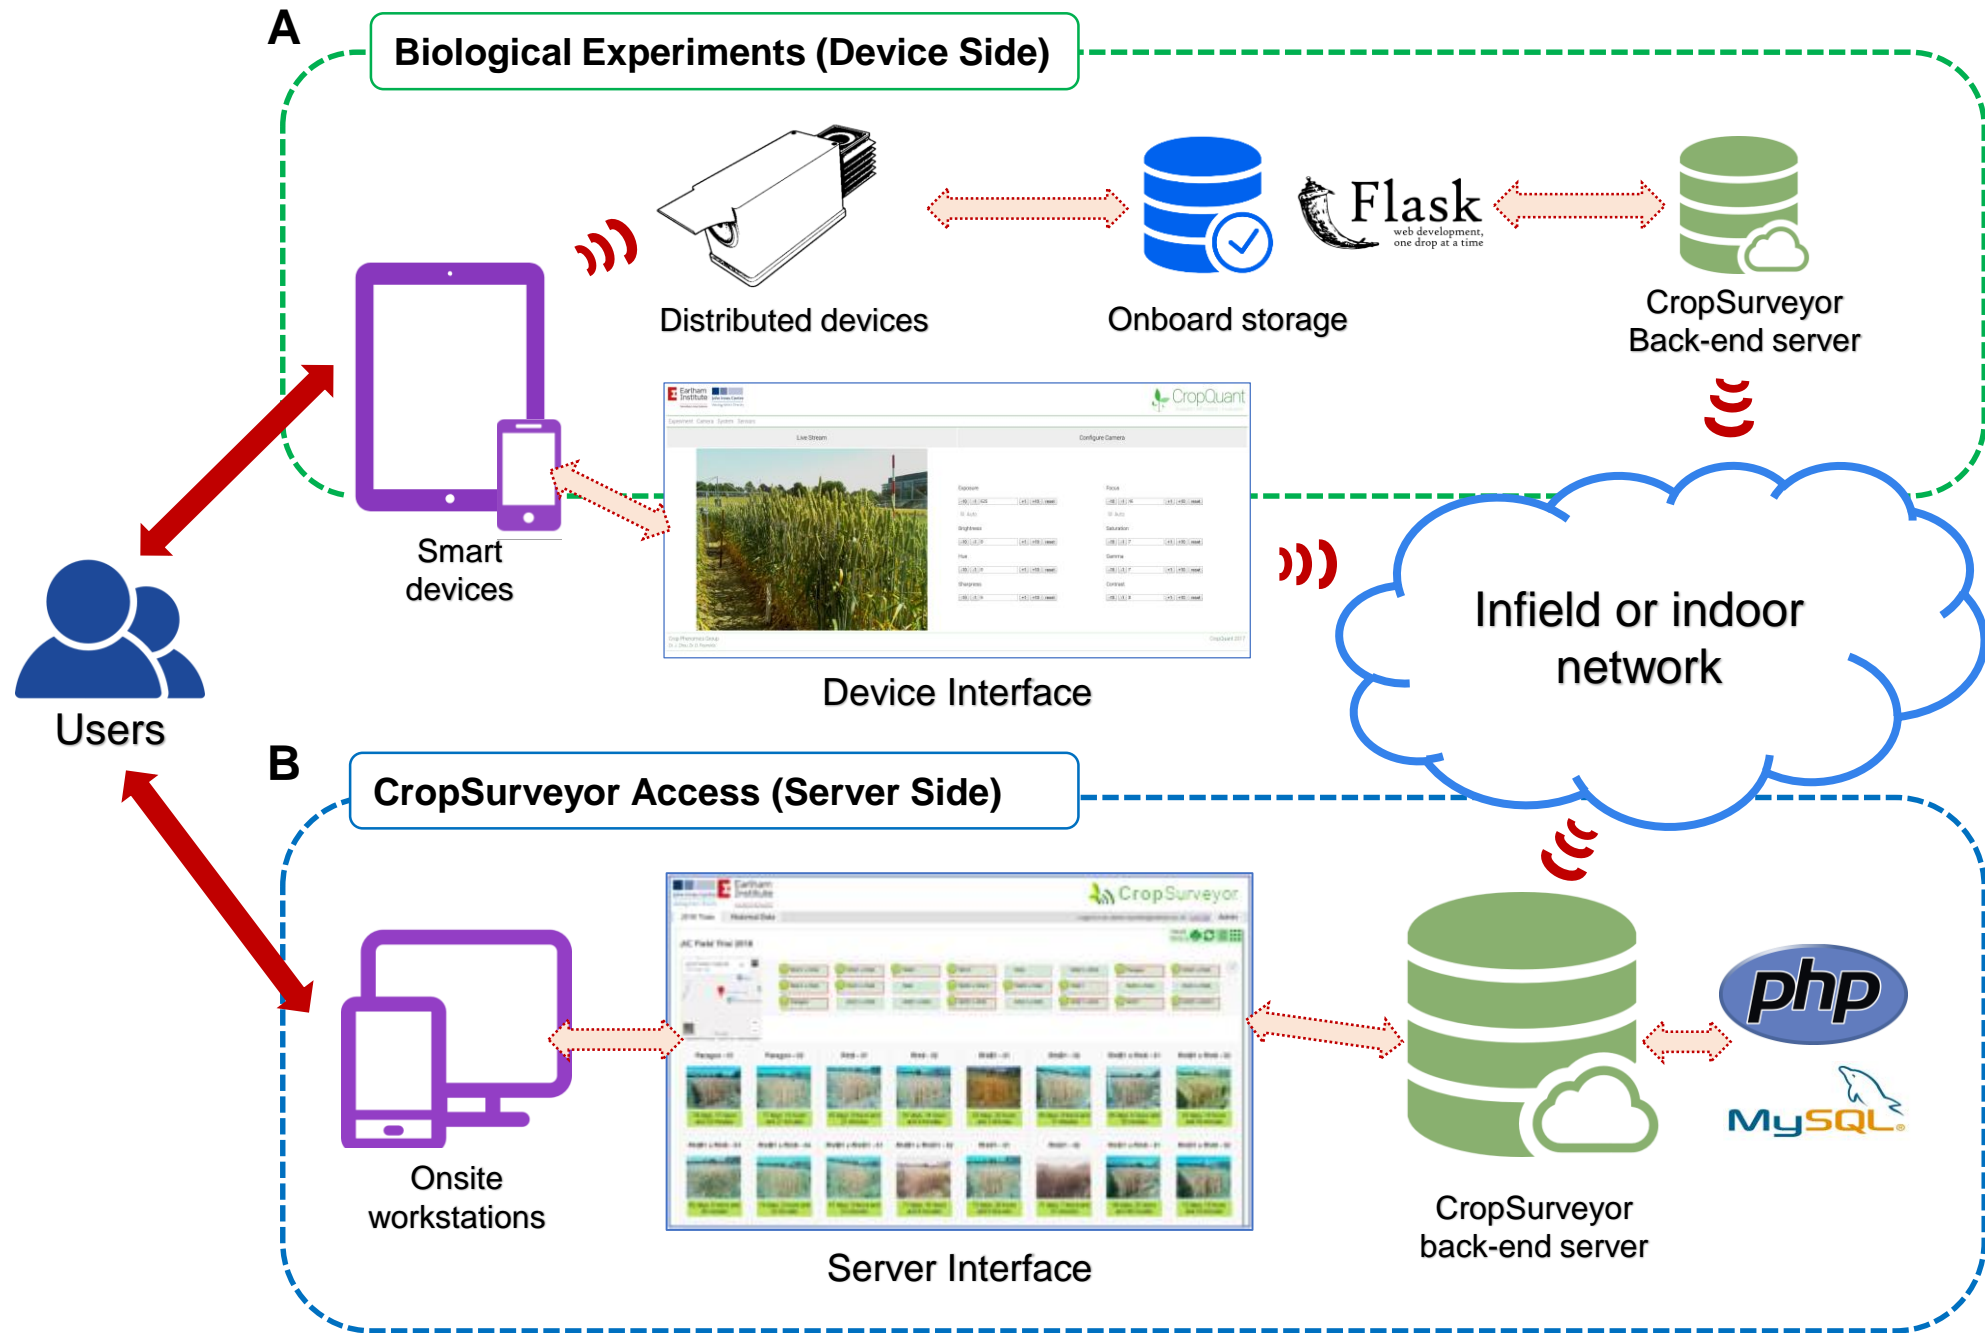

Fig. 1

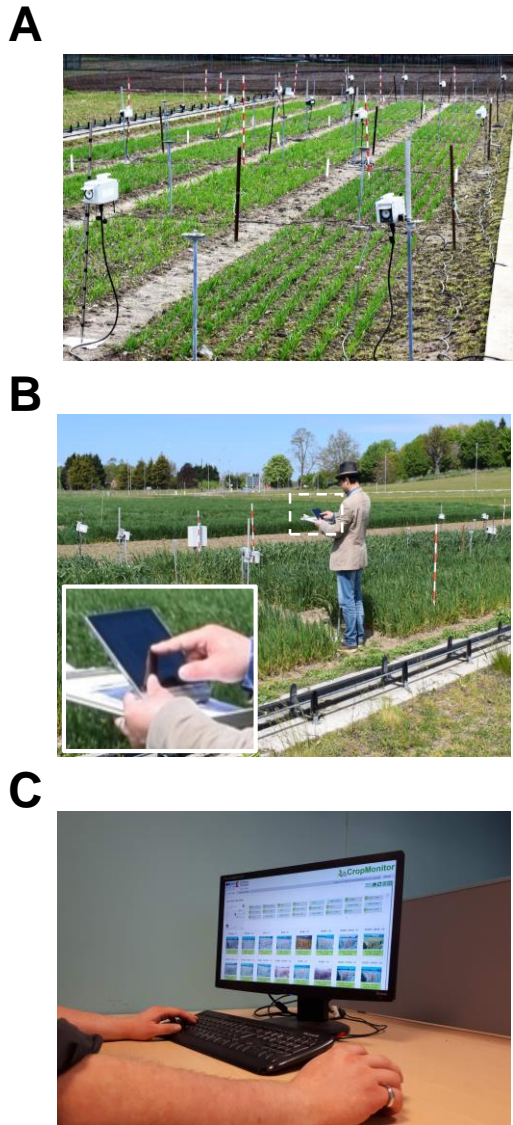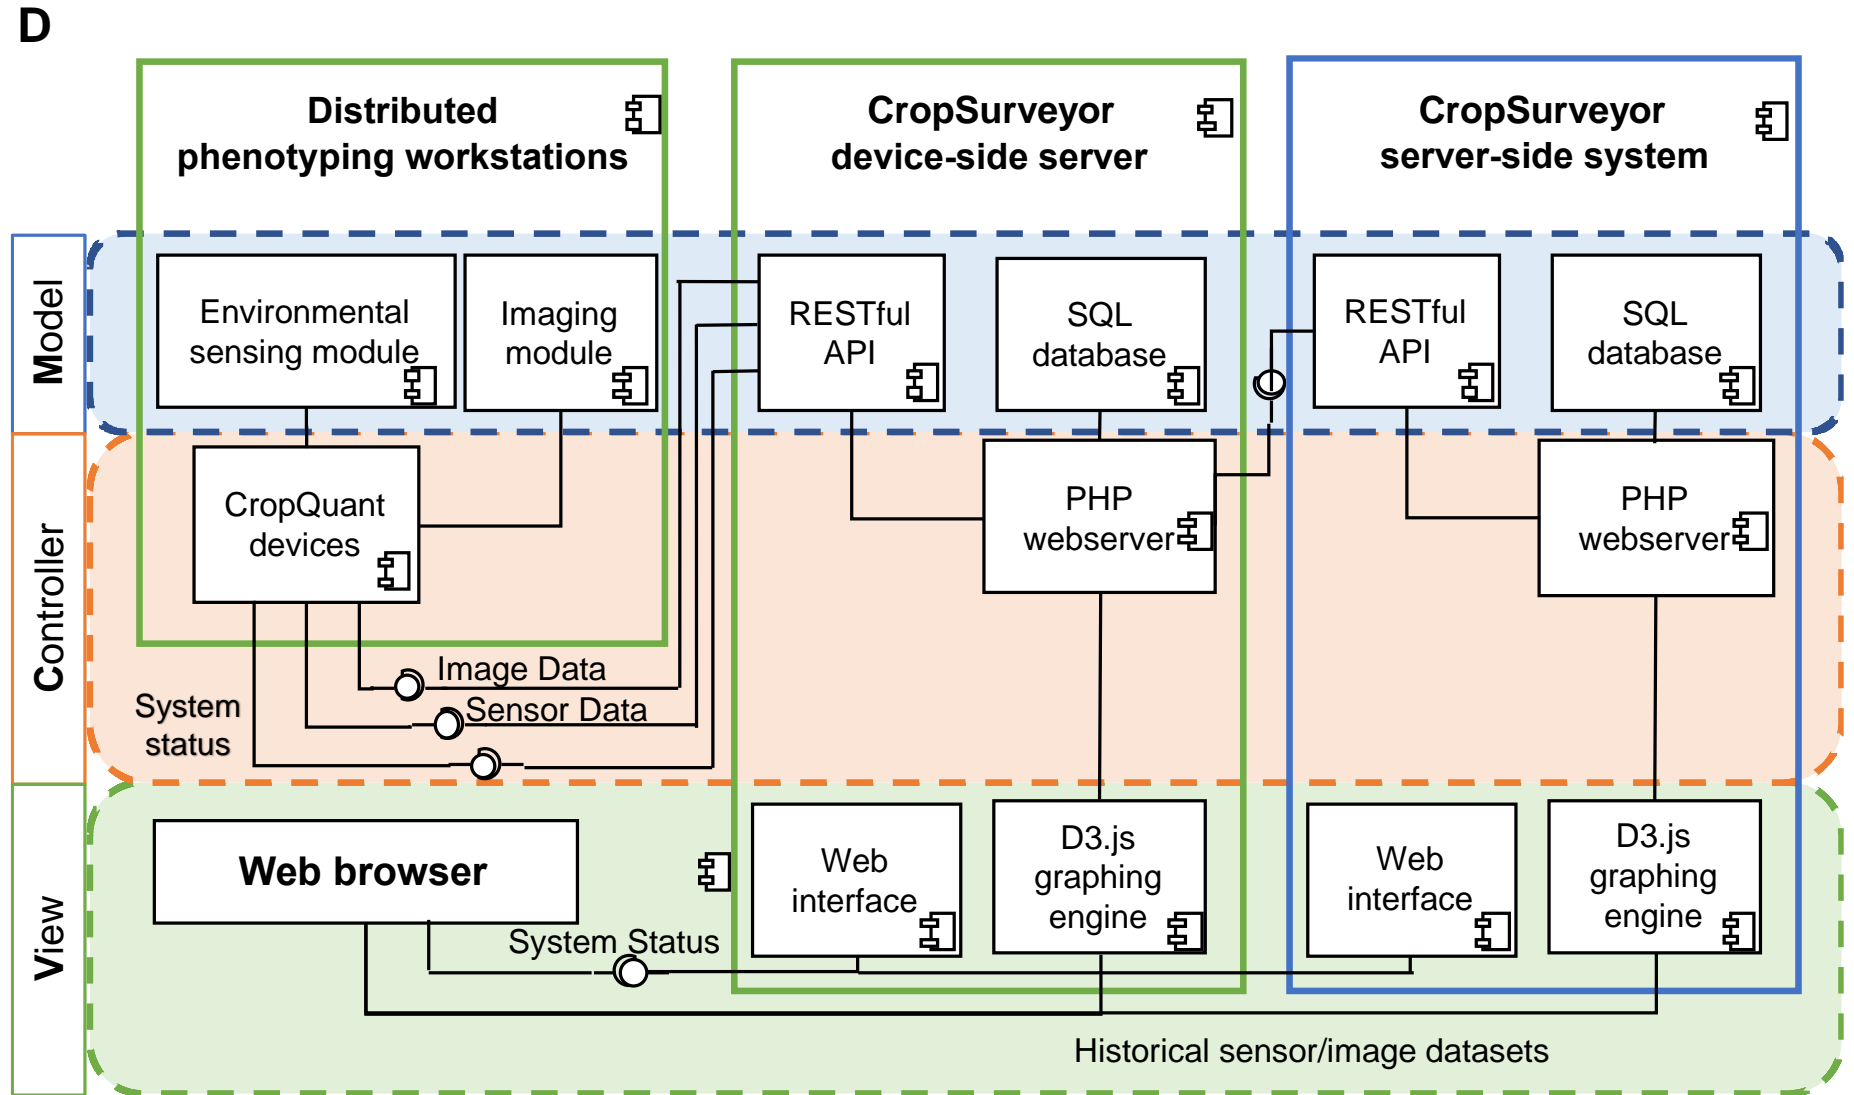

Fig. 2

A

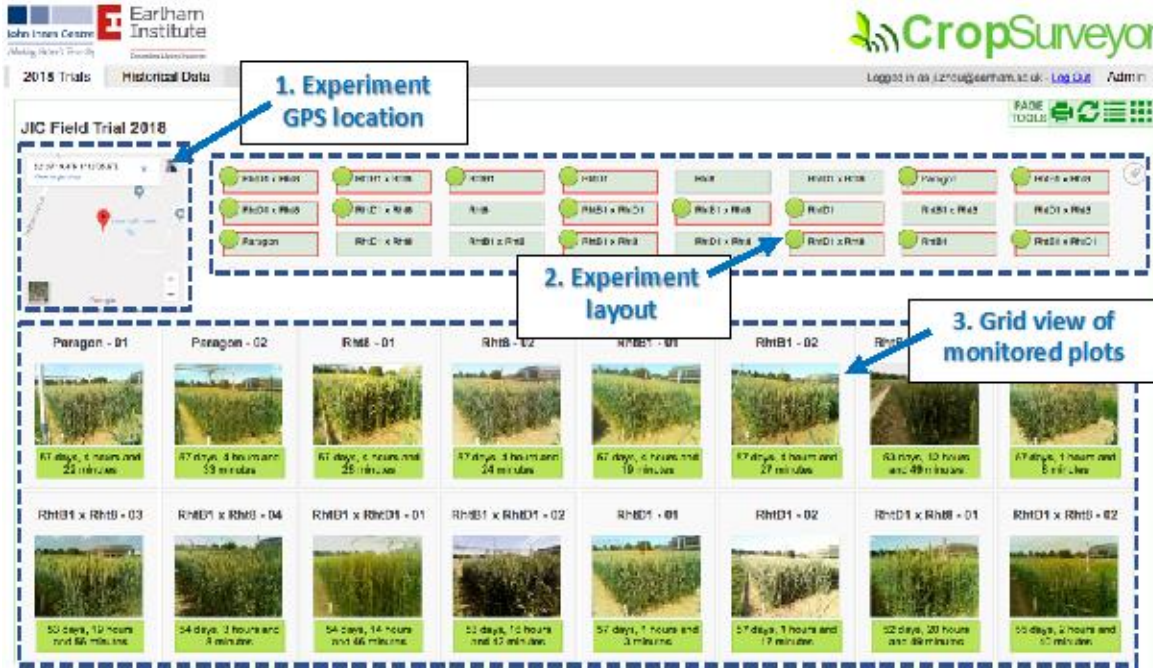

The grid view of CropSurveyor (server side)

B

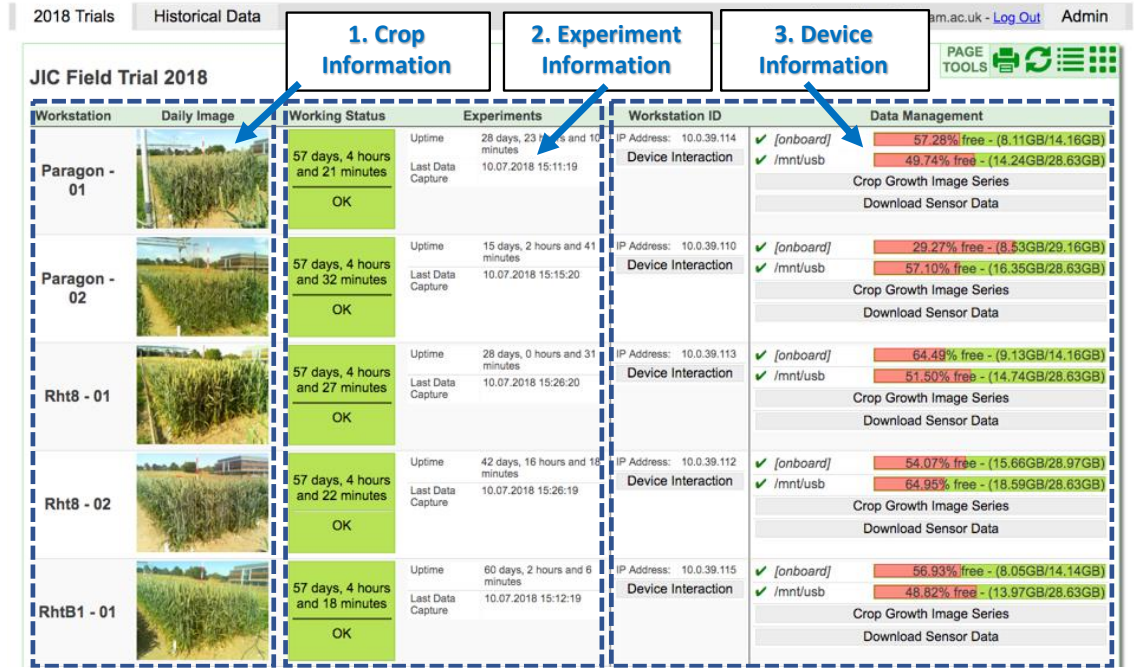

The list view of CropSurveyor (server side)

**A**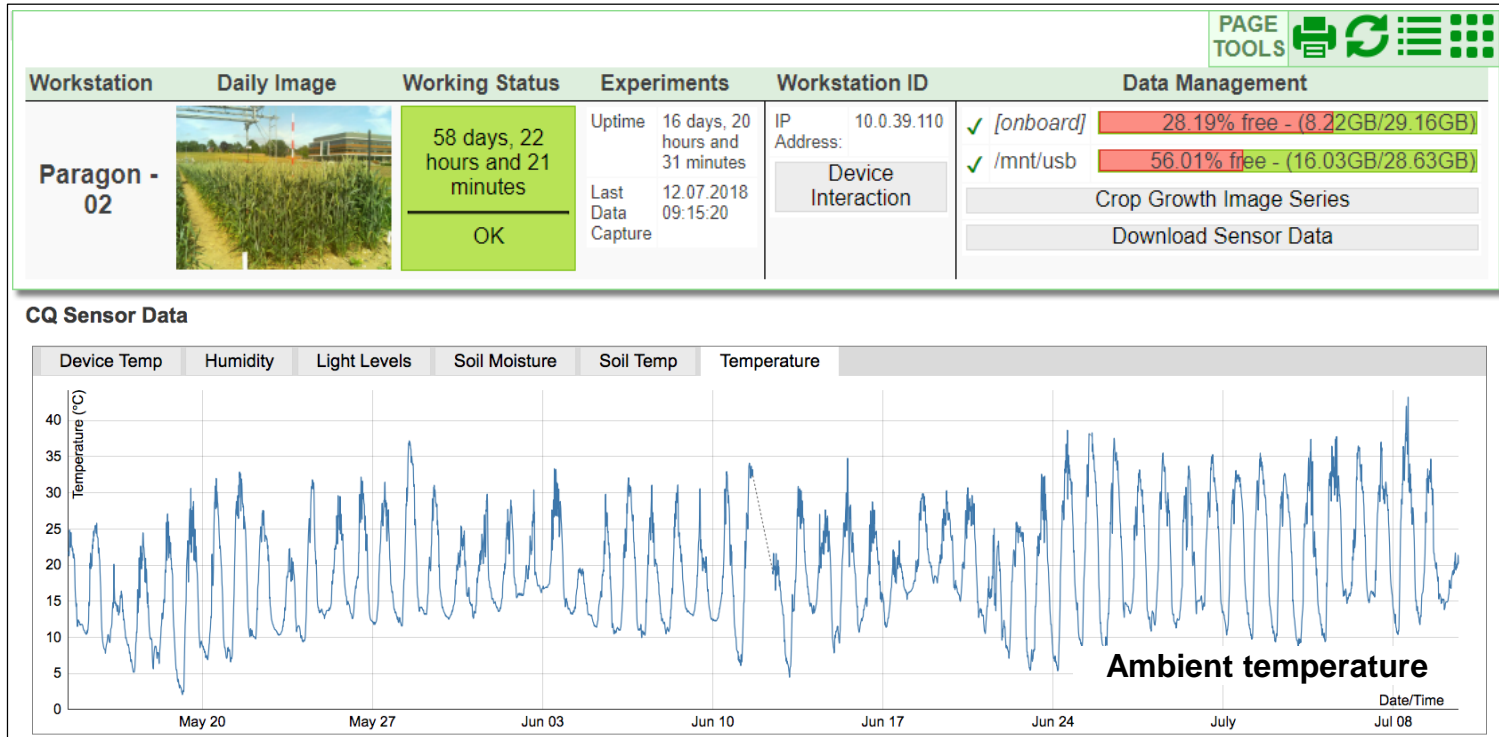**B**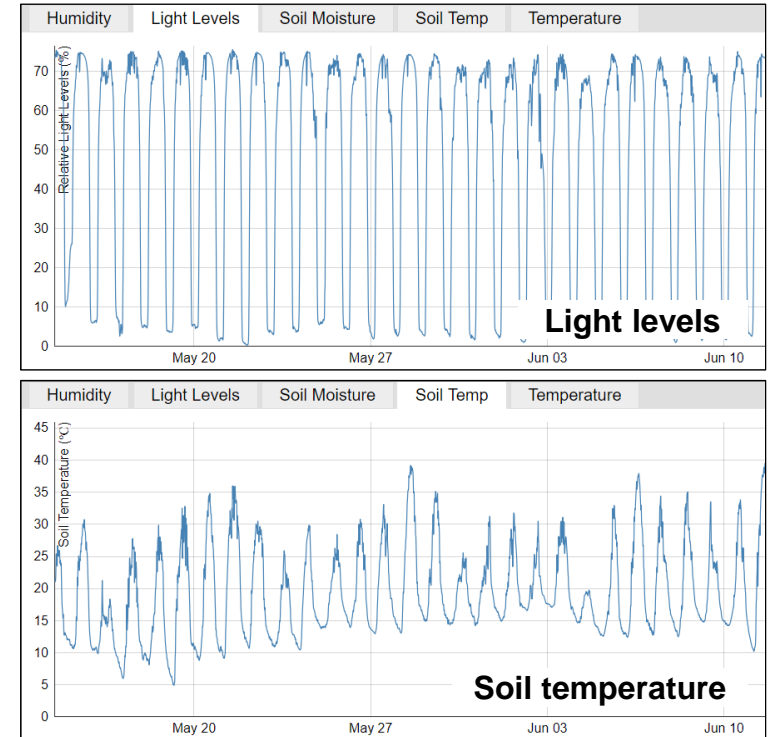

Fig. 4

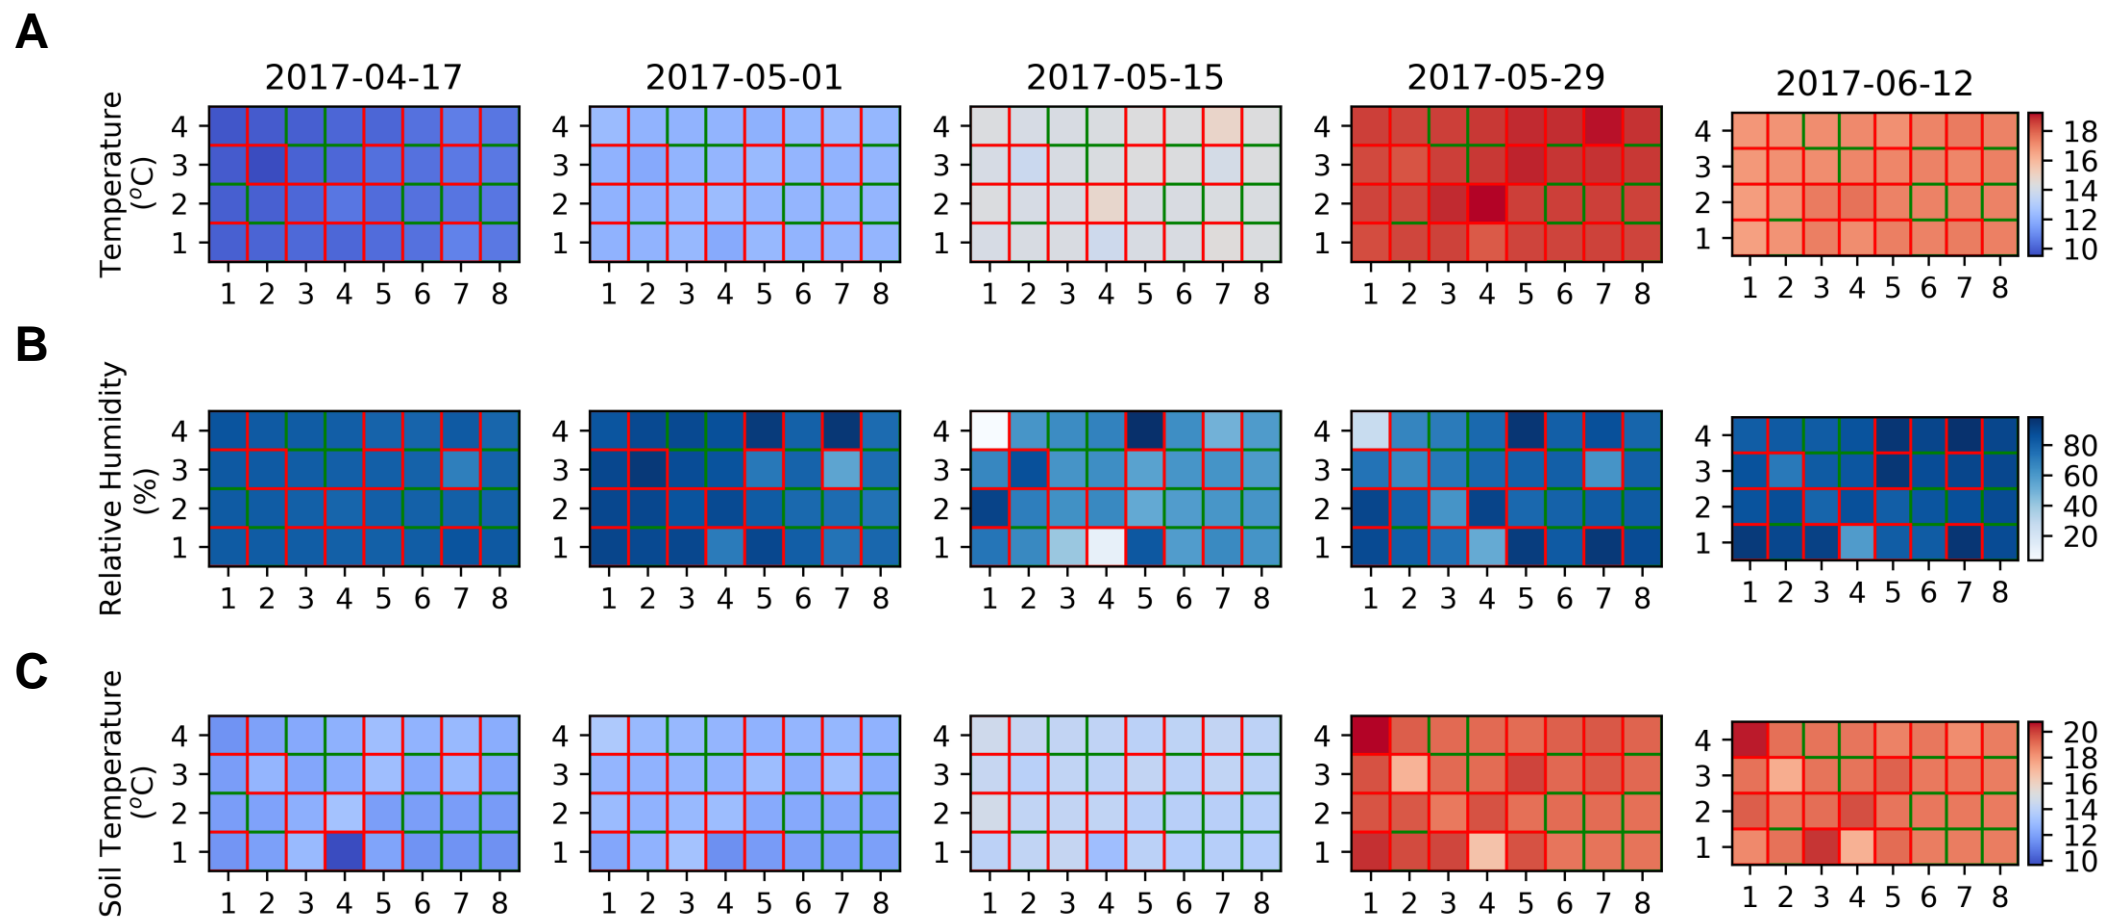

Fig. 5

A

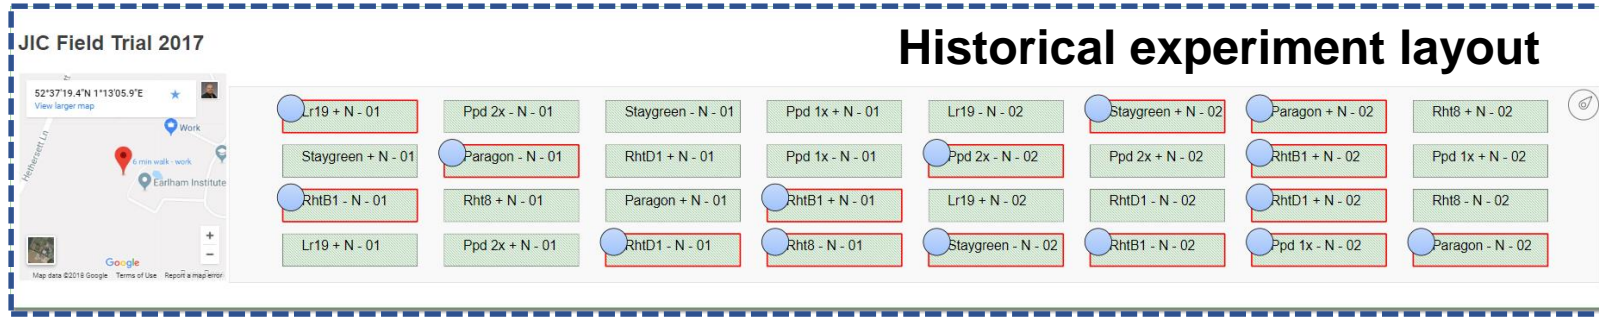

B

| Workstation  | Last Image Captured | Experiment Status    | Data Management                                                                                                                                         |
|--------------|---------------------|----------------------|---------------------------------------------------------------------------------------------------------------------------------------------------------|
| Lr19 +N - 01 |                     | Experiment Completed | Last Data Capture 18.07.2017 10:46:57<br><input type="button" value="Crop Growth Image Series"/><br><input type="button" value="Download Sensor Data"/> |
| Lr19 +N - 02 |                     | Experiment Completed | Last Data Capture 18.07.2017 10:57:27<br><input type="button" value="Crop Growth Image Series"/><br><input type="button" value="Download Sensor Data"/> |

**Historical data access**

C

### Monthly Image Series Archives

| Download                                            | Filesize | Number of Images |
|-----------------------------------------------------|----------|------------------|
| <a href="#">0398-de-d0-09-86-f8SB17_2017_03.zip</a> | 502.97M  | 155              |
| <a href="#">0498-de-d0-09-86-f8SB17_2017_04.zip</a> | 1.07G    | 331              |
| <a href="#">0598-de-d0-09-86-f8SB17_2017_05.zip</a> | 840.82M  | 254              |

**Image series archive**

Fig. 6

Live Stream

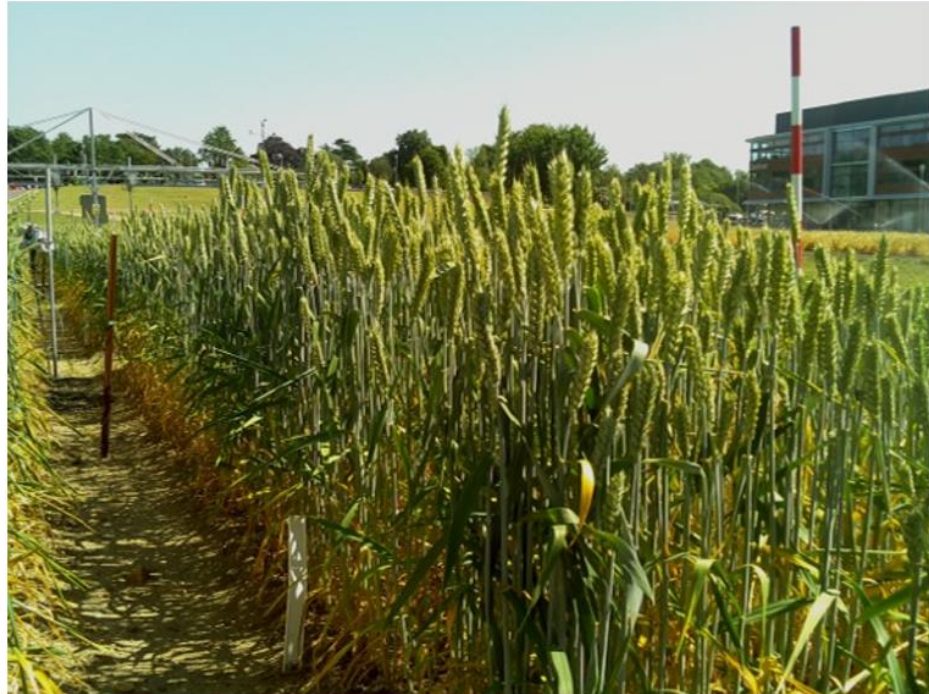

Configure Camera

Exposure

-10 -1 625 +1 +10 reset

Auto

Brightness

-10 -1 8 +1 +10 reset

Hue

-10 -1 0 +1 +10 reset

Sharpness

-10 -1 6 +1 +10 reset

Focus

-10 -1 16 +1 +10 reset

Auto

Saturation

-10 -1 7 +1 +10 reset

Gamma

-10 -1 7 +1 +10 reset

Contrast

-10 -1 8 +1 +10 reset



### Speed Breeding 2017

| Workstation | Last Image Captured                                                               | Experiment Status    | Data Management                                                                                                                                         |
|-------------|-----------------------------------------------------------------------------------|----------------------|---------------------------------------------------------------------------------------------------------------------------------------------------------|
| Conviron 4  |  | Experiment Completed | Last Data Capture 15.05.2017 09:30:15<br><input type="button" value="Crop Growth Image Series"/><br><input type="button" value="Download Sensor Data"/> |
| Glasshouse  |  | Experiment Completed | Last Data Capture No image found<br><input type="button" value="Crop Growth Image Series"/><br><input type="button" value="Download Sensor Data"/>      |

### JIC Field Trial 2017

| Workstation     | Last Image Captured                                                                 | Experiment Status    | Data Management                                                                                                                                         |
|-----------------|-------------------------------------------------------------------------------------|----------------------|---------------------------------------------------------------------------------------------------------------------------------------------------------|
| Lr19 +N - 01    |    | Experiment Completed | Last Data Capture 18.07.2017 10:46:57<br><input type="button" value="Crop Growth Image Series"/><br><input type="button" value="Download Sensor Data"/> |
| Lr19 +N - 02    |    | Experiment Completed | Last Data Capture 18.07.2017 10:57:27<br><input type="button" value="Crop Growth Image Series"/><br><input type="button" value="Download Sensor Data"/> |
| Lr19 -N - 01    |  | Experiment Completed | Last Data Capture 18.07.2017 10:57:01<br><input type="button" value="Crop Growth Image Series"/><br><input type="button" value="Download Sensor Data"/> |
| Paragon +N - 01 |  | Experiment Completed | Last Data Capture 18.07.2017 10:42:29<br><input type="button" value="Crop Growth Image Series"/><br><input type="button" value="Download Sensor Data"/> |

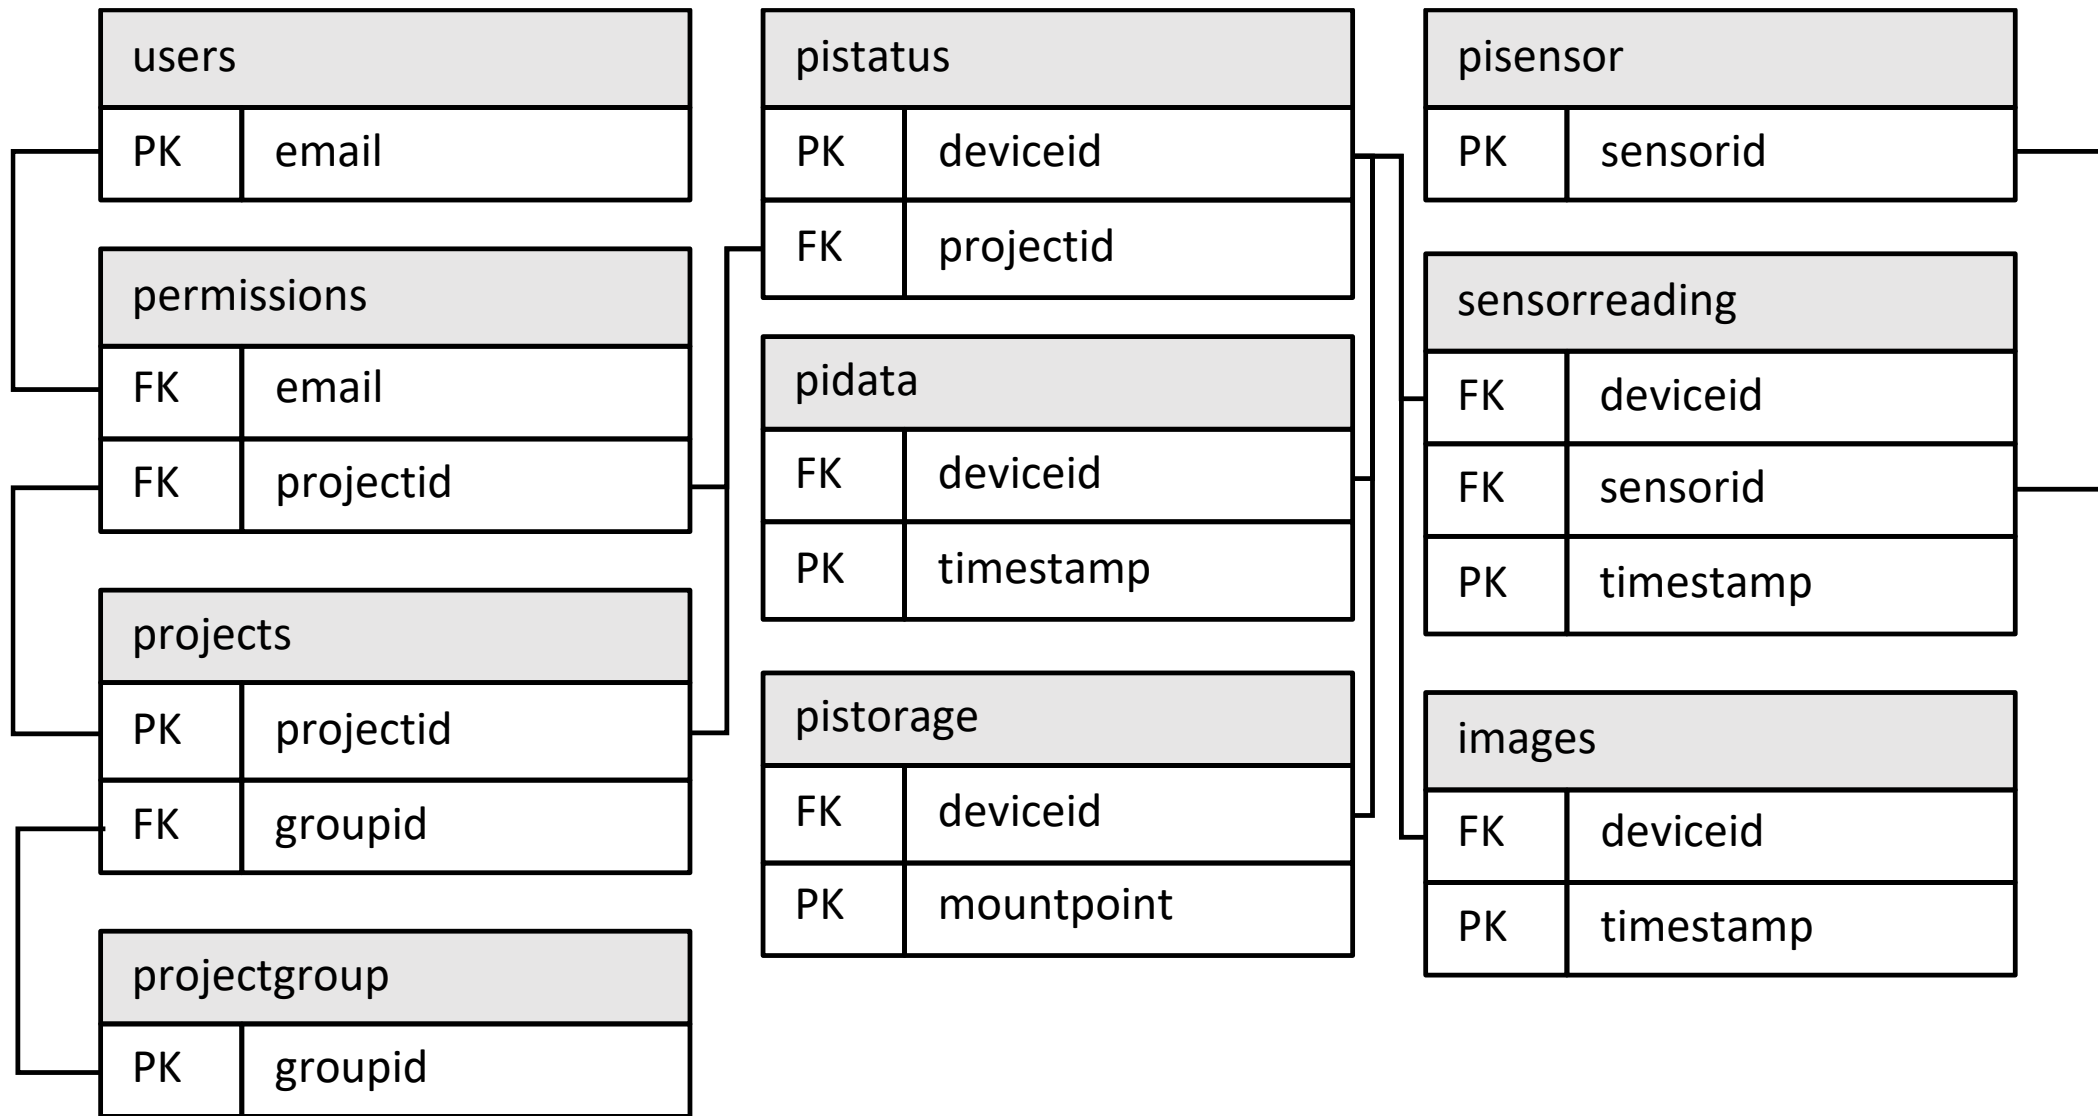

Supplementary Fig. 3

**A**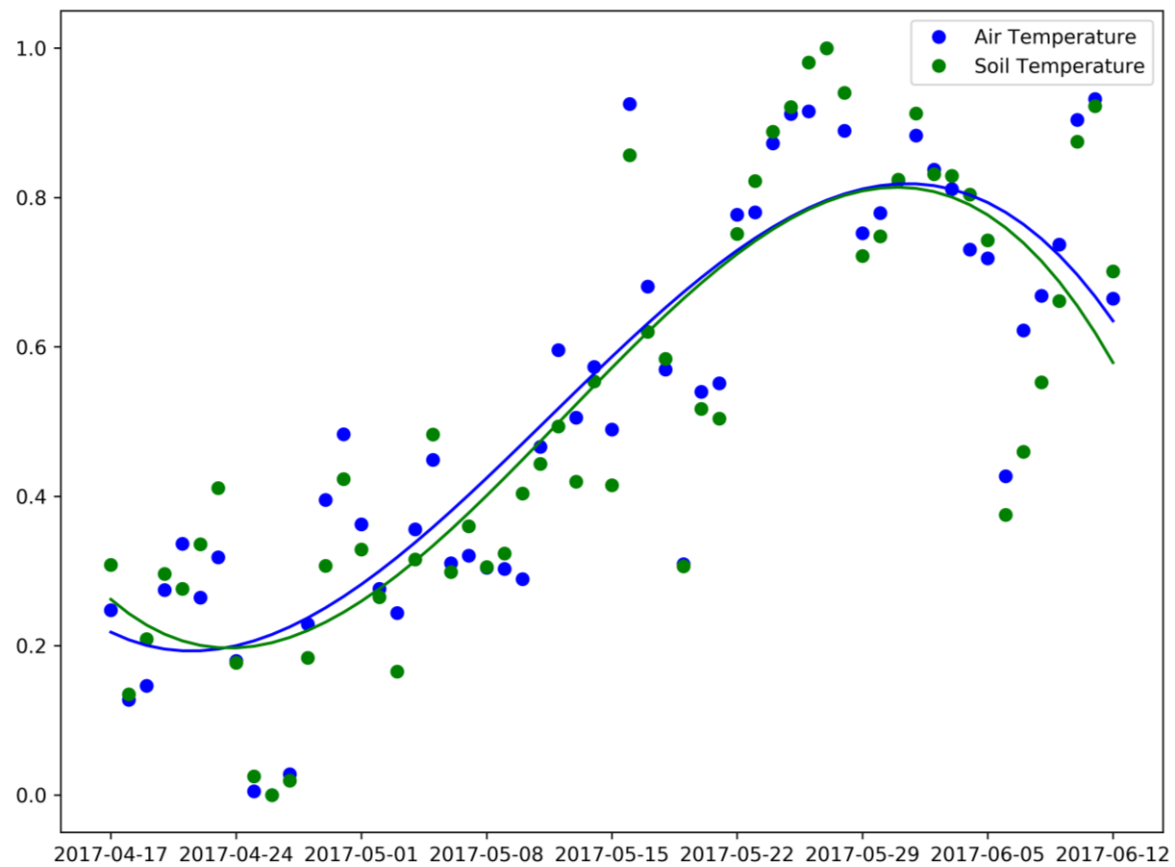**B**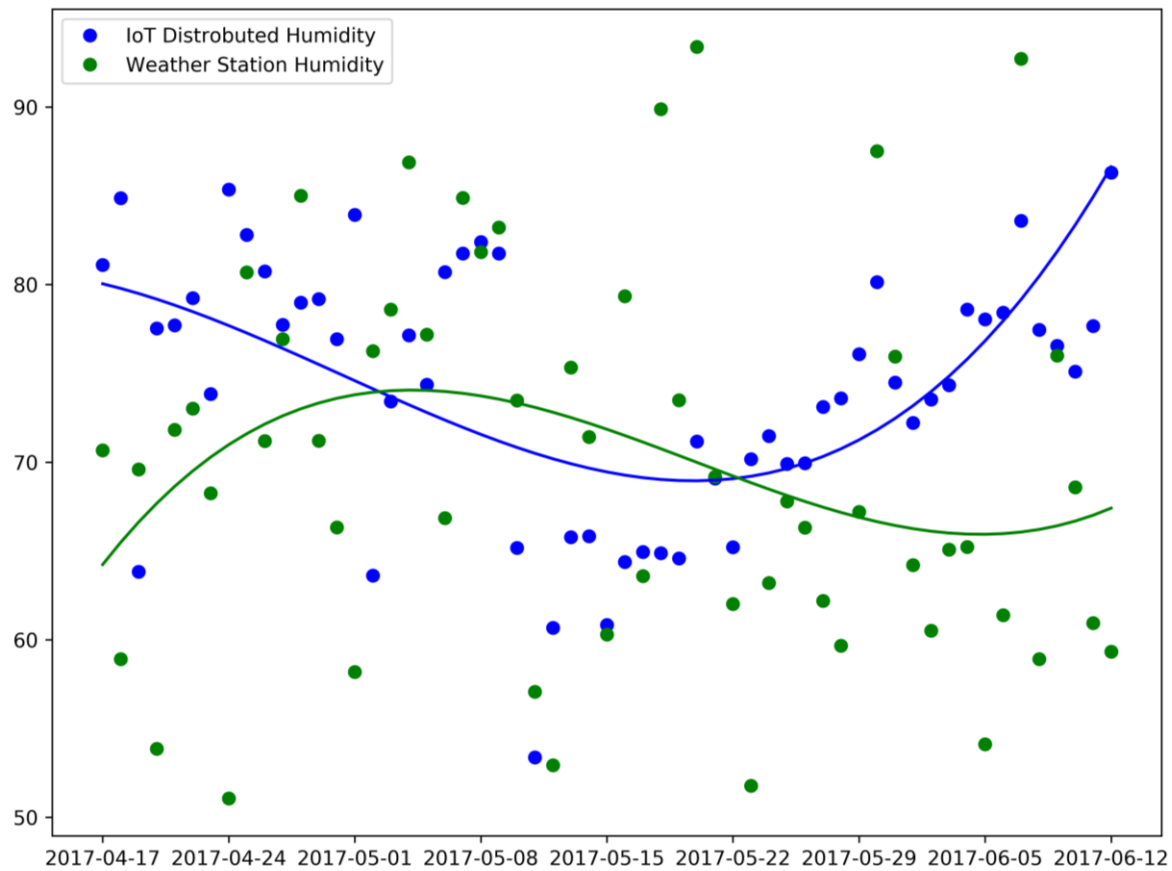

Source: https://www.biorxiv.org/content/10.1101/451120v2.full.pdf
